# Supplementary material for: Intracellular Isotope Localization in Ammonia sp. (Foraminifera) of Oxygen-Depleted Environments: Results of Nitrate and Sulfate Labeling Experiments
Source: Front Microbiol. 2016 Feb 19;7:163. doi: 10.3389/fmicb.2016.00163 (PMC4759270; doi:10.3389/fmicb.2016.00163)
Supplement: Supplementary file 3 [file Table3.XLS]

## Sheet: SuppleTable3_15N_anoxic
Supplementary table 3. Result of Steel-Dwass test of 15N atom% between each organelle and ultrastructure under anoxic condition. Upper right and lower left indicate the t values and p values, respectively.
	Vacuole	Mitochondrion	Organic lining	Electron dense body	Food vacuole	Possible endobiont	Plastid	Cytosome	Peroxisome	Lipid droplet	Resin
Vacuole	-	7.43393	4.28891	7.32717	4.94853	6.50476	2.48921	6.96704	3.16337	1.26346	1.87534
Mitochondrion	0.000***	-	0.391237	8.0492	3.32972	2.52248	0	3.74405	1.87829	4.34415	5.86861
Organic lining	0.001***	0.999999	-	5.5185	0.11333	0.458717	0.100088	0.320481	0.300264	2.92434	4.56564
Electron dense body	0.000***	0.000***	0.000***	-	5.01094	6.60729	2.42472	7.31152	3.13348	4.66691	5.7449
Food vacuole	0.000***	0.035*	1	0.000***	-	3.31279	0.0895913	4.24987	1.88142	3.04621	4.74096
Possible endobiont	0.000***	0.291148	0.999996	0.000***	0.037*	-	0.512823	0.419604	0.341944	4.15995	5.3519
Plastid	0.311	1	1	0.35	1	1	-	0.135282	0.288675	2.0087	3.00396
Cytosome	0.000***	0.008**	1	0.000***	0.001**	1	1	-	0.789183	4.37065	5.58257
Peroxisome	0.0590564	0.731785	1	0.0645	0.73	1	1	0.999	-	2.62677	3.00396
Lipid droplet	0.975	0.001***	0.115	0.000***	0.0828	0.002**	0.643	0.001***	0.235	-	2.83482
Resin	0.733699	0.000***	0.000***	0.000***	0.000***	0.000***	0.0931	0.000***	0.0931229	0.145	-
*p value < 0.05
**p value < 0.01
***p value < 0.001
